# Supplementary material for: Molecular Mechanisms of RSV and Air Pollution Interaction: A Scoping Review
Source: MDPI journal article supplement (doi:10.3390/ijms232012704), 2022-10-21
Supplement: s1 [file s1]

| Author                                                                              | Air pollutant                                         | Material/subjects                                                                                               | Country | Mechanism                                                  | Main results                                                                                                                                                                                                 |
|-------------------------------------------------------------------------------------|-------------------------------------------------------|-----------------------------------------------------------------------------------------------------------------|---------|------------------------------------------------------------|--------------------------------------------------------------------------------------------------------------------------------------------------------------------------------------------------------------|
| Becker and Soukup 1999 <sup>84</sup>                                                | NO2 (different concentrations: 0.5, 1.0, and 1.5 ppm) | Human bronchial epithelial cell line BEAS-2B                                                                    | USA     | Viral replication<br>IL- 6, IL-8                           | RSV internalization increased by 0.5 ppm exposure and decreased by 1.5 ppm exposure;<br>The release of infectious virus 48 h postexposure was reduced only after 1.5 ppm NO2 exposure;<br>Reduced IL-6, IL-8 |
| Becker, Soukup 1999<br>"Exposure to urban air particulates alters..." <sup>67</sup> | PM10 (EHC-93)                                         | human bronchial epithelial cell line BEAS-2B subclone S6 and human alveolar macrophage from BAL from volunteers | USA     | Viral uptake<br>IL-8, MIP-1alpha, MIP-1beta, MCP-1, RANTES | 50% decrease in viral uptake of virus by AM;<br>MCP-1 production inhibited;<br>MIP-1 and IL-8 levels lower than expected from a combined response;                                                           |

|                           |                            |                                                                                                            |     |                                                                                                         |                                                                                                                                                                                                                                                                            |
|---------------------------|----------------------------|------------------------------------------------------------------------------------------------------------|-----|---------------------------------------------------------------------------------------------------------|----------------------------------------------------------------------------------------------------------------------------------------------------------------------------------------------------------------------------------------------------------------------------|
|                           |                            |                                                                                                            |     |                                                                                                         | RSV-induced production of RANTES by epithelial cells was decreased in the presence of AM, but not affected by PM10                                                                                                                                                         |
| Castro 2008 <sup>91</sup> | Cigarette smoke condensate | A549, human alveolar type II-like epithelial cells, and 293, a human embryonic kidney epithelial cell line | USA | IL-8 (gene and protein expression), MCP-1 (gene and protein expression), nuclear factor kappa B (NF-kB) | Increased IL-8 and MCP-1 gene and protein expression<br>Enhanced activation of interferon regulatory factor (IRF)-1 and IRF-7<br>Enhanced activation of NF-kB, and increased NF-kB-driven gene transcription.<br>Increased chemokine expression in airway epithelial cells |

|                        |                            |                                                 |     |                                                                                                                                                                                                                                                                                         |                                                                                                                                                                                                                                                                                                                                                                                                                                       |
|------------------------|----------------------------|-------------------------------------------------|-----|-----------------------------------------------------------------------------------------------------------------------------------------------------------------------------------------------------------------------------------------------------------------------------------------|---------------------------------------------------------------------------------------------------------------------------------------------------------------------------------------------------------------------------------------------------------------------------------------------------------------------------------------------------------------------------------------------------------------------------------------|
| Castro 2011<br>72      | cigarette<br>smoke extract | Human<br>plasmacytoid<br>dendritic cells        | USA | <p>IFN-<math>\alpha</math><br/>IL-1<math>\beta</math>, IL-6, IL-10,<br/>TNF-<math>\alpha</math>, CCL2 (MCP-<br/>1), CCL3 (MIP-1a),<br/>CCL5 (RANTES),<br/>CXCL10 (IP-10),<br/>CXCL8 (IL-8)</p> <p>qRT-PCR for IRF-7,<br/>TLR7, TLR9 and 18S<br/>Intracellular staining<br/>of IRF-7</p> | <p>Inhibited RSV-<br/>induced IFN-<math>\alpha</math> in<br/>pDC, inhibited<br/>release of IL-1<math>\beta</math>,<br/>IL-10 and<br/>CXCL10.<br/>Not altered: IL-6,<br/>TNF-<math>\alpha</math>, CCL2,<br/>CCL3, CCL5 and<br/>CXCL8<br/>Decreased the<br/>expression of<br/>toll-like receptor<br/>(TLR)-7 and<br/>interferon<br/>regulatory factor<br/>(IRF)-7 in RSV-<br/>infected pDC.<br/>CSE prevented<br/>IRF-7 activation.</p> |
| Chakraborty<br>2017 42 | TiO <sub>2</sub> -NP       | Human primary<br>bronchial<br>epithelial cells) | USA | <p>Expression of NGF<br/>and its receptors:<br/>TrkA and p75NTR<br/>Autophagy (beclin-1<br/>expression)<br/>Cell death (FACS<br/>after annexin<br/>V/propidium iodide<br/>staining)</p>                                                                                                 | <p>RSV infection<br/>efficiency more<br/>than doubled;<br/>NGF and its<br/>TrkA receptor<br/>upregulated;<br/>Silencing NGF<br/>gene expression<br/>with siRNA<br/>significantly</p>                                                                                                                                                                                                                                                  |

|                                       |                                                               |                                                                                                                                         |               |                                       |                                                                                                                                                                                                                                                                        |
|---------------------------------------|---------------------------------------------------------------|-----------------------------------------------------------------------------------------------------------------------------------------|---------------|---------------------------------------|------------------------------------------------------------------------------------------------------------------------------------------------------------------------------------------------------------------------------------------------------------------------|
|                                       |                                                               |                                                                                                                                         |               |                                       | <p>inhibited RSV infection;</p> <p>Increase in necrotic cell death and reduction in apoptosis;</p> <p>Increase in expression of the autophagosomal gene beclin-1;</p> <p>Pharmacological inhibition of beclin-1-&gt; increased apoptotic rate and lower viral load</p> |
| <p>Cruz-Sanchez 2013<sup>43</sup></p> | <p>Mimics of ambient particulate matter (PM<sub>10</sub>)</p> | <p>human epithelial-2 (HEp-2) cells</p> <p>1HAEo-cells-normal human airway epithelial cells</p> <p>transformed with Simian virus 40</p> | <p>Canada</p> | <p>IL-6, IL-8</p> <p>RSV survival</p> | <p>Increased IL-6 and IL-8</p> <p>Accelerated viral entry (the mechanism involved endocytic pathway; dynamin dependent)</p>                                                                                                                                            |
| <p>Foronjy 2014<sup>86</sup></p>      | <p>Cigarette smoke</p>                                        | <p>C57BL/6J mice</p> <p>(repeated RSV</p>                                                                                               | <p>USA</p>    | <p>Histological analysis</p>          | <p>Enhanced influx of macrophages,</p>                                                                                                                                                                                                                                 |

|  |  |                      |  |                                                                                                                                                                                                                                                  |                                                                                                                                                                                                                                                                                                                                                                                                                             |
|--|--|----------------------|--|--------------------------------------------------------------------------------------------------------------------------------------------------------------------------------------------------------------------------------------------------|-----------------------------------------------------------------------------------------------------------------------------------------------------------------------------------------------------------------------------------------------------------------------------------------------------------------------------------------------------------------------------------------------------------------------------|
|  |  | exposition- 6 times) |  | Protease and Cytokine Measurements<br>Intracellular Signaling (cathepsin E, S, G, K, W, Z, MMP-28, actin)<br>Terminal Deoxynucleotidyl Transferase dUTP Nick Endlabeling (TUNEL) Analysis<br>Viral titers<br>Phosphatase Levels (PP2A and PTP1B) | neutrophils and lymphocytes;<br>Most pronounced around the vasculature and bronchial airways;<br>Airspace enlargement and fibrosis;<br>Induced cytokine (IL-1 $\alpha$ , IL-17, IFN- $\gamma$ , KC, IL-13, CXCL9, RANTES, MIF and GM-CSF) and protease (MMP-2, -8, -12, -13, -16 and cathepsins E, S, W and Z) expression.;<br>Enhanced apoptosis;<br>Reduced protein phosphatase 2A (PP2A) and protein tyrosine phosphates |
|--|--|----------------------|--|--------------------------------------------------------------------------------------------------------------------------------------------------------------------------------------------------------------------------------------------------|-----------------------------------------------------------------------------------------------------------------------------------------------------------------------------------------------------------------------------------------------------------------------------------------------------------------------------------------------------------------------------------------------------------------------------|

|                            |                    |                                                                                                                                                                                                                                                                     |     |                                                                                                                                                                                                                                                    |                                                                                                                                                                                                                                                                                                                                                                                                                                                             |
|----------------------------|--------------------|---------------------------------------------------------------------------------------------------------------------------------------------------------------------------------------------------------------------------------------------------------------------|-----|----------------------------------------------------------------------------------------------------------------------------------------------------------------------------------------------------------------------------------------------------|-------------------------------------------------------------------------------------------------------------------------------------------------------------------------------------------------------------------------------------------------------------------------------------------------------------------------------------------------------------------------------------------------------------------------------------------------------------|
|                            |                    |                                                                                                                                                                                                                                                                     |     |                                                                                                                                                                                                                                                    | (PTP1B)<br>expression and<br>activity                                                                                                                                                                                                                                                                                                                                                                                                                       |
| Foronjy 2016 <sup>87</sup> | Cigarette<br>smoke | lung BALF from<br>age-matched<br>healthy control<br>subjects,<br>smokers, and<br>subjects with<br>COPD<br><br>Ptp1b (Ptpn1<br>gene) knockout<br>(-/-) mice<br><br>human primary<br>small airway<br>epithelial and<br>mouse bone<br>marrow<br>derived<br>macrophages | USA | Protein tyrosine<br>phosphatase 1B<br>(PTP1B)<br><br>S100A9<br><br>Caspase-3, p-IκBα,<br>IκBα (Ser32), p-p38<br>(Thr180/Tyr182),<br>p38, TRIF, MyD88,<br>IRAK1, pp44/42<br>MAPK (Erk1/2)<br>(Thr202/Tyr204),<br>ERK1/2, β-actin<br><br>Viral titer | Ptp1b -/- mice -><br>exaggerated<br>immune cell<br>infiltration,<br>damaged<br>epithelial cell<br>barriers, cytokine<br>production,<br>increased<br>apoptosis, and<br>elevated<br>expression of<br>S100A9<br>Pre-exposure to<br>cigarette smoke<br>desensitized<br>PTP1B activity -><br>enhanced<br>S100A9 secretion<br>and<br>inflammation.<br>S100A9 levels in<br>human BALF- an<br>inverse<br>relationship with<br>lung function in<br>healthy subjects, |

|                               |                         |                                           |     |                                                                                                                                                                                                                                      |                                                                                                                                                                                                                                                                                                                           |
|-------------------------------|-------------------------|-------------------------------------------|-----|--------------------------------------------------------------------------------------------------------------------------------------------------------------------------------------------------------------------------------------|---------------------------------------------------------------------------------------------------------------------------------------------------------------------------------------------------------------------------------------------------------------------------------------------------------------------------|
|                               |                         |                                           |     |                                                                                                                                                                                                                                      | smokers and COPD subjects. HBEC from COPD donors-secreted more S100A9 following RSV infection.                                                                                                                                                                                                                            |
| Groskreutz 2009 <sup>44</sup> | Cigarette smoke extract | Primary human tracheobronchial epithelial | USA | <p>Cytokine measurements</p> <p>Cell Death Detection (ELISA + TUNEL Assay)</p> <p>Cell Survival Assays</p> <p>Fluorescent RSV/DAPI Staining</p> <p>Plaque Assay</p> <p>Western blot detection of cleaved caspases 3 and 7 showed</p> | <p>Less apoptosis; Necrosis rather than apoptosis;</p> <p>Less live cells, but increased viral load;</p> <p>The effect inhibited by pretreatment with N-acetylcysteine and aldehyde dehydrogenase;</p> <p>Cigarette Smoke Prevents RSV- and Staurosporine-Induced Caspase 3 and 7 Activation; p53 or XIAP not altered</p> |

|                   |                         |              |     |                                                                                                                                                                                                                                           |                                                                                                                                                                                                                                                                                                                                                                                                                                                 |
|-------------------|-------------------------|--------------|-----|-------------------------------------------------------------------------------------------------------------------------------------------------------------------------------------------------------------------------------------------|-------------------------------------------------------------------------------------------------------------------------------------------------------------------------------------------------------------------------------------------------------------------------------------------------------------------------------------------------------------------------------------------------------------------------------------------------|
| Harrod 2003<br>29 | Diesel engine emissions | C57Bl/6 mice | USA | <p>Inflammatory cells in BALF</p> <p>Lung histology</p> <p>TNF-<math>\alpha</math>, IFN-<math>\gamma</math></p> <p>Clara cell secretory protein, CCSP (=CC-10 or CC-16)</p> <p>Surfactant protein A (SP-A) and proprotein B (proSP-B)</p> | <p>Increased viral gene expression;</p> <p>Increased cell numbers in BALF, domination of alveolar macrophages (AM, &gt;95%);</p> <p>Augmented lung inflammation (peribronchial and peribronchiolar regions) and airway epithelial remodeling (loss of the normal cuboidal appearance of nonciliated bronchiolar epithelial (Clara) cells; increased appearance of pseudostratified, columnar epithelial cell morphology and apparent airway</p> |
|-------------------|-------------------------|--------------|-----|-------------------------------------------------------------------------------------------------------------------------------------------------------------------------------------------------------------------------------------------|-------------------------------------------------------------------------------------------------------------------------------------------------------------------------------------------------------------------------------------------------------------------------------------------------------------------------------------------------------------------------------------------------------------------------------------------------|



|                                |                      |             |       |                                                                                                                                                                              |                                                                                                                                                                                                                                                                                                                       |
|--------------------------------|----------------------|-------------|-------|------------------------------------------------------------------------------------------------------------------------------------------------------------------------------|-----------------------------------------------------------------------------------------------------------------------------------------------------------------------------------------------------------------------------------------------------------------------------------------------------------------------|
|                                |                      |             |       |                                                                                                                                                                              | <p>epithelial cell sloughing); a dose-related increase in lung histopathology; Mucous cell metaplasia; Increased TNF-<math>\alpha</math> and IFN-<math>\gamma</math>; Attenuation of CCSP production, the numbers of CCSP-producing cells diminished; Surfactant proprotein B (proSP-B) decreased; Decreased SP-A</p> |
| <p>Hashiguchi<sup>85</sup></p> | TiO <sub>2</sub> -NP | BALB/c mice | Japan | <p>IL-2, IL-4, IL-10, IFN-<math>\gamma</math>, RANTES (CCL5), MIP-1<math>\alpha</math> (CCL3)<br/>Flow cytometric analysis<br/>Histological examination<br/>Viral titres</p> | <p>Increased IFN-<math>\gamma</math> and RANTES<br/>Viral titers unaffected<br/>An increase in the infiltration of lymphocytes into the alveolar septa in lung tissues</p>                                                                                                                                            |

|                                       |                           |                                                                          |        |                                                                                                                             |                                                                                                                                                                                                        |
|---------------------------------------|---------------------------|--------------------------------------------------------------------------|--------|-----------------------------------------------------------------------------------------------------------------------------|--------------------------------------------------------------------------------------------------------------------------------------------------------------------------------------------------------|
|                                       |                           |                                                                          |        |                                                                                                                             |                                                                                                                                                                                                        |
| Hirota 2015 <sup>73</sup>             | PM10 (EHC93)              | human airway epithelial cell line (HBEC-6KT)                             | Canada | IL-1 $\beta$ , CCL20, GM-CSF, TSLP, IL-33, and IL-25<br>Differential Interference Contrast and Scanning Confocal Microscopy | No effect on IL-1 $\beta$ responses                                                                                                                                                                    |
| Hobson and Everard 2007 <sup>48</sup> | Nitric oxide              | human monocyte-derived dendritic cells (DCs)                             | UK     | Viral titres<br>Viral persistence                                                                                           | RSV replication outside the RSV epidemic season after exposure to nitric oxide                                                                                                                         |
| Ivanciuc 2019 <sup>112</sup>          | side-stream tobacco smoke | cystathionine $\gamma$ -lyase enzyme (CSE)- deficient and wild-type mice | USA    | Airway hyperresponsiveness (AHR) to methacholine challenge<br>Viral replication<br>Inflammatory cytokines and chemokines    | CSE-deficient mice: more severe clinical disease, airway obstruction and AHR, enhanced viral replication and lung inflammation, a significant increase in the number of neutrophils in BALF, increased |

|                                                                                 |                                       |                                 |        |                                                                                                                                                                                                                                                                                                                                                        |                                                                                                                                                                                                                                                                     |
|---------------------------------------------------------------------------------|---------------------------------------|---------------------------------|--------|--------------------------------------------------------------------------------------------------------------------------------------------------------------------------------------------------------------------------------------------------------------------------------------------------------------------------------------------------------|---------------------------------------------------------------------------------------------------------------------------------------------------------------------------------------------------------------------------------------------------------------------|
|                                                                                 |                                       |                                 |        |                                                                                                                                                                                                                                                                                                                                                        | levels of inflammatory cytokines and chemokines.                                                                                                                                                                                                                    |
| Kaan and Hegele 2003 <sup>47</sup>                                              | PM10 (EHC-93)                         | Guinea pig alveolar macrophages | Canada | IL-6, IL-8<br>RSV Yield (the amount of viral replication per RSV-immunopositive cell)                                                                                                                                                                                                                                                                  | Enhanced secretion of TNF- $\alpha$ , decreased RSV Yield                                                                                                                                                                                                           |
| Lambert 2003 "Effect of Preexposure to Ultrafine Carbon Black..." <sup>79</sup> | Preexposure to ultrafine carbon black | BALB/c mice                     | USA    | TNF- $\alpha$<br>IL-13<br>IFN- $\gamma$ -inducible protein 10 (IP-10) mRNA<br><br>lymphotactin, RANTES, eotaxin, MIP-1 $\alpha$ , MIP-1 $\beta$ , MIP-2, MCP-1, and TCA-3, housekeeping genes L32 and GAPDH<br><br>RNA templates for interleukins 10, 13, 15, 9, 2, 6, and IFN- $\gamma$ and interleukins 10, 1 $\alpha$ , 1 $\beta$ , 1 $\alpha$ , 6, | Reduced TNF- $\alpha$ in BALF on days 1 and 2 of infection; a reduction in BALF lymphocyte numbers on day 4, reduced IP-10, lymphotactin, and IFN- $\gamma$ mRNAs; No changes in RANTES, eotaxin, MCP-1, MIP-1; Lower viral titers on days 2–4 of infection; by day |

|                                                                             |                                            |             |     |                                                                                                                                                                                                                                                   |                                                                                                                                                                                                                                              |
|-----------------------------------------------------------------------------|--------------------------------------------|-------------|-----|---------------------------------------------------------------------------------------------------------------------------------------------------------------------------------------------------------------------------------------------------|----------------------------------------------------------------------------------------------------------------------------------------------------------------------------------------------------------------------------------------------|
|                                                                             |                                            |             |     | and IFN- $\gamma$ , L32 and GAPDH genes                                                                                                                                                                                                           | 7 neutrophil numbers, proinflammatory cytokine mRNA expression, and protein levels of TNF- $\alpha$ and IL-13 increased                                                                                                                      |
| Lambert 2003<br>"Ultrafine Carbon Black Particles Enhance..." <sup>96</sup> | Ultrafine carbon black after RSV infection | BALB/c mice | USA | AHR to methacholine<br><br>bronchoalveolar lavage and cell differentials<br><br>MIP-1 $\alpha$ , MCP-1, and RANTES<br><br>RSV antigen quantitation<br><br>Laser capture microdissection of alveolar epithelium<br><br>Reverse transcription (MIP- | Viral titer and clearance unaffected by CB exposure; Neutrophil numbers elevated on days 4 and 7, and lymphocyte numbers were higher on days 4 and 14 of infection in CB-exposed, RSV-infected mice; Enhanced AHR, BAL total protein, MCP-1, |

|                            |                 |              |     |                                                                                                                                                                                                                                                                                                                                |                                                                                                                                                                                                                                                                                                                         |
|----------------------------|-----------------|--------------|-----|--------------------------------------------------------------------------------------------------------------------------------------------------------------------------------------------------------------------------------------------------------------------------------------------------------------------------------|-------------------------------------------------------------------------------------------------------------------------------------------------------------------------------------------------------------------------------------------------------------------------------------------------------------------------|
|                            |                 |              |     | 1 $\alpha$ and the housekeeping gene L32)                                                                                                                                                                                                                                                                                      | MIP1- $\alpha$ , RANTES; MIP-1- $\alpha$ mRNA expression increased in the alveolar epithelium, where ultrafine particles deposit in the lung                                                                                                                                                                            |
| Mebratu 2016 <sup>78</sup> | Cigarette smoke | C57BL/6 mice | USA | <p>Lung inflammatory cells, histology and morphometry</p> <p>TUNEL assay</p> <p>mRNA levels for IL-17a, IL-17c, IL-17d, IL-17 f. IL-1<math>\beta</math>, IL-12b, IL-18, IL-23a, Ccl-2, Ccl-7 at day 4 post infection in lung tissue</p> <p>Quantitative RT-PCR for MMP-12 mRNA at day 14 post infection.</p> <p>Viral load</p> | <p>Inflammation characterized y by lymphocytes and neutrophils; Robust emphysema with enhanced MMP-12 mRNA expression and TUNEL positivity;</p> <p>Increased the levels of IL-17 (a, b, d, f), IL-1<math>\beta</math>, IL-12b, IL-18, IL-23a, Ccl-2, Ccl-7 mRNAs in the lungs;</p> <p>By day 4 lower copy number of</p> |

|                             |                         |                                                                                            |     |                                                                                                                                                                                                                                                                                                                                                                                                                                                 |                                                                                                                                                                                                                                                                                                                                                                                                                                                                     |
|-----------------------------|-------------------------|--------------------------------------------------------------------------------------------|-----|-------------------------------------------------------------------------------------------------------------------------------------------------------------------------------------------------------------------------------------------------------------------------------------------------------------------------------------------------------------------------------------------------------------------------------------------------|---------------------------------------------------------------------------------------------------------------------------------------------------------------------------------------------------------------------------------------------------------------------------------------------------------------------------------------------------------------------------------------------------------------------------------------------------------------------|
|                             |                         |                                                                                            |     |                                                                                                                                                                                                                                                                                                                                                                                                                                                 | viruses, but higher on day 14.                                                                                                                                                                                                                                                                                                                                                                                                                                      |
| Modestou 2010 <sup>45</sup> | Cigarette smoke extract | Human trachea and bronchial samples<br><br>Primary human tracheobronchial epithelial cells | USA | Antibodies against: <ul style="list-style-type: none"> <li>- interferon regulatory factor-9 (IRF-9)</li> <li>- ICAM-1</li> <li>- Stat1</li> <li>- tyrosine-701 phosphorylated human Stat1</li> <li>- heat shock protein (HSP)-90</li> <li>- <math>\beta</math>-actin</li> <li>- serine-727 phosphorylated human Stat1</li> <li>- serine-727 phosphorylated human Stat1</li> </ul> ICAM-1<br>Epithelial Cytotoxicity Assays<br>Glutathione Assay | Inhibited IFN- $\gamma$ -dependent gene expression (not due to cell loss or cytotoxicity);<br>Inhibited IFN- $\gamma$ -induced Stat1 phosphorylation;<br>Decreased inhibitory effect of IFN- $\gamma$ on RSV mRNA and protein expression;<br>CSE effects on IFN- $\gamma$ -induced Stat1 activation, antiviral protein expression, and inhibition of RSV infection decreased by glutathione augmentation of epithelial cells (N-ACC or glutathione monoethyl ester) |

|                                 |                                                          |                                                                                                       |     |                                                                                                                           |                                                                                                                                                                                                                                                                                                                                      |
|---------------------------------|----------------------------------------------------------|-------------------------------------------------------------------------------------------------------|-----|---------------------------------------------------------------------------------------------------------------------------|--------------------------------------------------------------------------------------------------------------------------------------------------------------------------------------------------------------------------------------------------------------------------------------------------------------------------------------|
| Phaybouth<br>2006 <sup>46</sup> | side-stream<br>cigarette<br>smoke                        | Newborn<br>BALB/cmice<br>(RSV infection<br>twice)                                                     | USA | Pathologic analysis<br>RT-PCR analysis of<br>viral gene<br>expression<br>IL-5, IL-12, IL-13,<br>and IFN- $\gamma$<br>CCSP | Neutrophilia and<br>decreased CCSP<br>levels in<br>response to RSV<br>rechallenge;<br>An increase in<br>BALF<br>eosinophils,<br>reduced levels of<br>IFN- $\gamma$ , and IL-12,<br>decreased lung<br>tissue<br>inflammation,<br>and decreased<br>mucus<br>production after<br>RSV rechallenge;<br>Increased viral<br>gene expression |
| Poon 2019 <sup>111</sup>        | Cigarette<br>smoke- mice<br><br>COPD patients<br>Smokers | Mice exposed to<br>cigarette smoke<br><br>BALF from<br>healthy never<br>smokers, and<br>COPD patients | USA | LIF<br>LIFR                                                                                                               | LIF in human<br>BALF reduced in<br>both smokers<br>and COPD<br>patients;<br>HBE cells<br>isolated from<br>COPD patients<br>produced less<br>LIF during RSV<br>infection;                                                                                                                                                             |

|                                  |                                      |                                                                            |     |                                                                                                       |                                                                                                                                                                                                                                                                                                                                                                                  |
|----------------------------------|--------------------------------------|----------------------------------------------------------------------------|-----|-------------------------------------------------------------------------------------------------------|----------------------------------------------------------------------------------------------------------------------------------------------------------------------------------------------------------------------------------------------------------------------------------------------------------------------------------------------------------------------------------|
|                                  |                                      | Human<br>bronchial<br>epithelial (HBE)                                     |     |                                                                                                       | Reduced LIF and<br>its receptor<br>(LIFR) in mice<br>lungs Smoke-<br>exposed animals<br>had reduced LIF<br>expression<br>during RSV<br>infection.                                                                                                                                                                                                                                |
| Smallcombe<br>2020 <sup>37</sup> | Titanium<br>dioxide<br>nanoparticles | Immortalized<br>human<br>bronchial<br>epithelial cells<br><br>C57BL/6 mice | USA | Epithelial cell barrier<br>integrity<br>Viral titer<br>Reactive oxygen<br>species (ROS)<br>generation | Apical junctional<br>complex (AJC)<br>disruption<br>induced by RSV<br>amplified by<br>TiO <sub>2</sub> -NP;<br>Increased viral<br>infection in<br>epithelial cells;<br>TiO <sub>2</sub> induced<br>generation of<br>ROS, and<br>pretreatment<br>with antioxidant<br>(N-ACC)<br>reversed barrier<br>dysfunction;<br>In vivo, RSV-<br>induced injury<br>and AJC<br>disruption were |



|                                          |                                                                 |                                    |     |                                                                                             |                                                                                                                                                                                                          |
|------------------------------------------|-----------------------------------------------------------------|------------------------------------|-----|---------------------------------------------------------------------------------------------|----------------------------------------------------------------------------------------------------------------------------------------------------------------------------------------------------------|
|                                          |                                                                 |                                    |     |                                                                                             | augmented in the lungs of mice given TiO <sub>2</sub> -NP; Airway inflammation was exacerbated (WBC infiltration into the BAL), along with exaggeration of peribronchial inflammation and AIC disruption |
| Raza 1999 <sup>77</sup>                  | water-soluble cigarette smoke extract (CSE), nicotine, cotinine | monocytes of the blood from donors | UK  | TNF- $\alpha$<br>nitric oxide (NO)(as nitrites)                                             | Increased TNF- $\alpha$ and decreased NO, higher proportion of extreme responses                                                                                                                         |
| Soukup, Koren, Becker 1993 <sup>83</sup> | ozone                                                           | Human alveolar macrophages         | USA | IL1, IL-6, TNF<br><br>Percentage RSV-infected AM<br><br>Amount of infectious virus released | No difference in percentage of infected AM or in the amount of infectious RSV produced; Effects on IL-1 and IL-6 secretion were only found with the lowest                                               |

|                           |                   |      |     |                                                                                                                                                                                                                                                         |                                                                                                                      |
|---------------------------|-------------------|------|-----|---------------------------------------------------------------------------------------------------------------------------------------------------------------------------------------------------------------------------------------------------------|----------------------------------------------------------------------------------------------------------------------|
|                           |                   |      |     |                                                                                                                                                                                                                                                         | levels of infection which induced cytokine release; TNF production unaffected by ozone                               |
| Urrego 2009 <sup>98</sup> | Nicotine exposure | Rats | USA | <p>RT-PCR for NGF, brain-derived neurotrophic factor (BDNF), p75NTR, trkA, trkB, and the housekeeping gene <math>\beta</math>-actin</p> <p>NGF, BDNF, p75NTR, trkA, trkB, protein levels</p> <p>Extravasation of albumin from airway blood vessels.</p> | An additive effect on NGF expression, exaggerated neurogenic airway inflammation (abolished by selective inhibition) |

**Table S2.** The characteristics of the studies included in the scoping review.
