# Supplementary material for: Molecular Mechanisms of RSV and Air Pollution Interaction: A Scoping Review
Source: MDPI journal article supplement (doi:10.3390/ijms232012704), 2022-10-21
Supplement: s1 [file s1]

PubMed search strategy:

Search within categories was executed with the use of OR, while all the major categories were connected with AND. The PubMed translate engine was used.

Major categories:

- A. Etiology
- B. Air pollution
- C. Molecular mechanism

MeSH terms relating to the etiology:

- 1. Respiratory syncytial virus.

Keywords terms relating to the pathogen:

MeSH terms relating to the air pollution:

- 1. Air pollution
- 2. Environmental pollutants
- 3. Air pollutants
- 4. Particulate matter
- 5. Carbon monoxide
- 6. Nitrogen dioxide
- 7. Sulfur dioxide

Keywords terms relating to the air pollution:

- 1. Ambient pollution
- 2. PM2.5
- 3. PM 2.5
- 4. PM10
- 5. PM 10
- 6. Carbon oxide

MeSH terms relating to the pathomechanism:

- 1. Pathology, molecular
- 2. Up-regulation
- 3. Down-regulation

Keywords terms relating to the pathomechanism:

1. Pathomechanism

2. Regulat\*

regulat\* OR susceptib\* OR increas\* OR decreas\* OR induc\* OR chang\* OR pathogenesis OR  
supress\* OR interacti\* OR enhanc\* OR block\* OR respon\* OR dysregulat\* OR receptor OR  
epithel\* OR surface OR alter\*
