# Supplementary material for: Molecular Mechanisms of RSV and Air Pollution Interaction: A Scoping Review
Source: MDPI journal article supplement (doi:10.3390/ijms232012704), 2022-10-21
Supplement: s1 [file s1]

|    |                                                                                                                                          |
|----|------------------------------------------------------------------------------------------------------------------------------------------|
| D1 | Is it clear in the study what is the 'cause' and what is the 'effect' (i.e. there is no confusion about which variable comes first)?     |
| D2 | Were the participants included in any comparisons similar?                                                                               |
| D3 | Were the participants included in any comparisons receiving similar treatment/care, other than the exposure or intervention of interest? |
| D4 | Was there a control group?                                                                                                               |
| D5 | Were there multiple measurements of the outcome both pre and post the intervention/exposure?                                             |
| D6 | Was follow up complete and if not, were differences between groups in terms of their follow up adequately described and analyzed?        |
| D7 | Were the outcomes of participants included in any comparisons measured in the same way?                                                  |
| D8 | Were outcomes measured in a reliable way?                                                                                                |
| D9 | Was appropriate statistical analysis used?                                                                                               |

**Table S3.** JBI Checklist for Quasi-Experimental Studies (non-randomized experimental studies).
