# Supplementary material for: Molecular Mechanisms of RSV and Air Pollution Interaction: A Scoping Review
Source: Int J Mol Sci. 2022 Oct 21;23(20):12704. doi: 10.3390/ijms232012704 (PMC9604398; doi:10.3390/ijms232012704)
Supplement: Supplementary file 1 [file ijms-23-12704-s001.zip]

Archive with 5 entries (5 files):
- S1. PubMed search strategy.pdf
- Table S1. Preferred Reporting Items for Systematic reviews and Meta-Analyses extension for Scoping Reviews (PRISMA-ScR) Checklist.pdf
- Table S2. The characteristics of the studies included in the scoping review..pdf
- Table S3. JBI Checklist for Quasi-Experimental Studies (non-randomized experimental studies).pdf
- Table S4. Funding sources of the studies included in the review..pdf
